# Supplementary material for: Synthetic miRNAs induce dual arboviral-resistance phenotypes in the vector mosquito Aedes aegypti
Source: PubMed Central journal article supplement (PMC6053081; doi:10.1038/s42003-017-0011-5), 2018-02-08

**Supplementary Table 1. Details on artificial antiviral miRNAs**

| miRNA name   | Sequence (5' – 3')     | Targeting virus | Targeting region | Coverage (%) |
|--------------|------------------------|-----------------|------------------|--------------|
| Anti-CHIKV-1 | AGTCAGTTCTGCTTCTCGTTCT | CHIKV           | NSP1             | 96.9         |
| Anti-CHIKV-2 | ACTCATTCGTAGTGCGCATTTT |                 | NSP2             | 96.9         |
| Anti-CHIKV-3 | TATATACCCACCTGCCCTGTCT |                 | NSP3-NSP4        | 96.9         |
| Anti-CHIKV-4 | TCTATGATCTTCACTTCCATGT |                 | NSP4             | 100          |
| Anti-CHIKV-5 | ACTCTTCTTGATAGTTTGGTTC |                 | E2               | 96.9         |
| Anti-CHIKV-6 | GTTTTGCATGATTCGGACTTCT |                 | E2               | 96.9         |
| Anti-DENV3-1 | TTCATTGTTCCATCATCATCA  | DENV-3          | NS2B             | 96.6         |
| Anti-DENV3-2 | CCTGTGTGTTTCAGATTTTGTG |                 | NS3              | 96.9         |
| Anti-DENV3-3 | AATATGACCAGCCTCCTCTTCC |                 | NS3              | 98.6         |
| Anti-DENV3-4 | CATTTATCATGGAGGAGGCTGA |                 | NS5              | 97.2         |

**Supplementary Table 2. Performances of *Aedes aegypti* microinjections**

| Construct       | Eggs injected | Survival to larval stage | G0 adults |        | Integration events |
|-----------------|---------------|--------------------------|-----------|--------|--------------------|
|                 |               |                          | Male      | Female |                    |
| PUB>4miR:DENV-3 | 432           | 187                      | 81        | 70     | 1                  |
| PUB>6miR:CHIKV  | 595           | 153                      | 85        | 68     | 5                  |
| PUB>10miR       | 310           | 153                      | 76        | 60     | 3                  |
| CPA>10miR       | 185           | 85                       | 11        | 12     | 5                  |

**Supplementary Table 3. Primers used for miRNA qPCR in this study**

|               |                              |
|---------------|------------------------------|
| aae-miR-1:    | 5'-TGGAATGTAAAGAAGTATGGAG-3' |
| 10miR_DENV-3: | 5'-TTCATTGTTCCATCATCATCA-3'  |
| 10miR_CHIKV:  | 5'-TCTATGATCTTCACTTCCATGT-3' |

#### Supplementary Table 4. Details on primers used for constructing synthetic antiviral miRNA cassettes.

| Oligo name                              | Sequence (5' - 3')                                         |
|-----------------------------------------|------------------------------------------------------------|
| tub-3'UTR_BamHI/XhoI-F                  | GGCGGATCCCGCCCTCGAGATCCGTCACAAGCAATCTCACTA                 |
| SV40-3'UTR_NotI-R                       | GGCCCGCGGCCGCGACTCTAGATCATAATCAGCCATAC                     |
| pMOS1_fusion_FseI/PstIAePub-pr-F        | GACGAGATCGGCCGGCCCGCCCTGCAGTATCTTTACATGTAGCTTGTGCATTGAATCC |
| pMOS1_fusion_BglII/EcoRIaPub-pr-R       | AGATCTGGCCGAATTCGTTGAAATCTCTGTTGAGCAGAAAAAGAAACGAG         |
| pMOS1_fusion_FseI/PstIAeCPA-pr-F        | GACGAGATCGGCCGGCCCGCCCTGCAGATACATAAACTAGTTTTTGCACA         |
| pMOS1_fusion_BglII/EcoRIaCPA-pr-R       | AGATCTGGCCGAATTCCTCAACTAACCGATACACACTAACCTGG               |
| Oxitec #4573_BglII-mutate-F             | TCTTGGGTCGAGAGCGCAGGAACAGGTGGTGGCGGCCCTCGGTGCGC            |
| Oxitec #4573_XhoI-mutate-R              | CAAACGGACGCCCGAGGTTGCACAACACTATTATCGATTTGC                 |
| pMOS1_fusion_Hr5IE1-DsRed_marker_NotI-F | TCTAGAGTCGCGGCCGCTCCGGTGGATCTTACGGGTCCTCCACCTCCGC          |
| pMOS1_fusion_Hr5IE1-DsRed_marker_XmaI-R | TTCGAGCTCGCCCGGCATTGCTTGTCAATTATTAATTTGGATGATGTCA          |

**Supplementary Figure 1. Southern blot analyses of transgenic mosquitoes.** Genomic DNAs were digested with restriction enzyme *Bgl*III or *Sca*I, and hybridized at 42°C with random primed alpha [<sup>32</sup>P]-labeled DNA probes complementary to the sequence of the antiviral miRNA cluster.

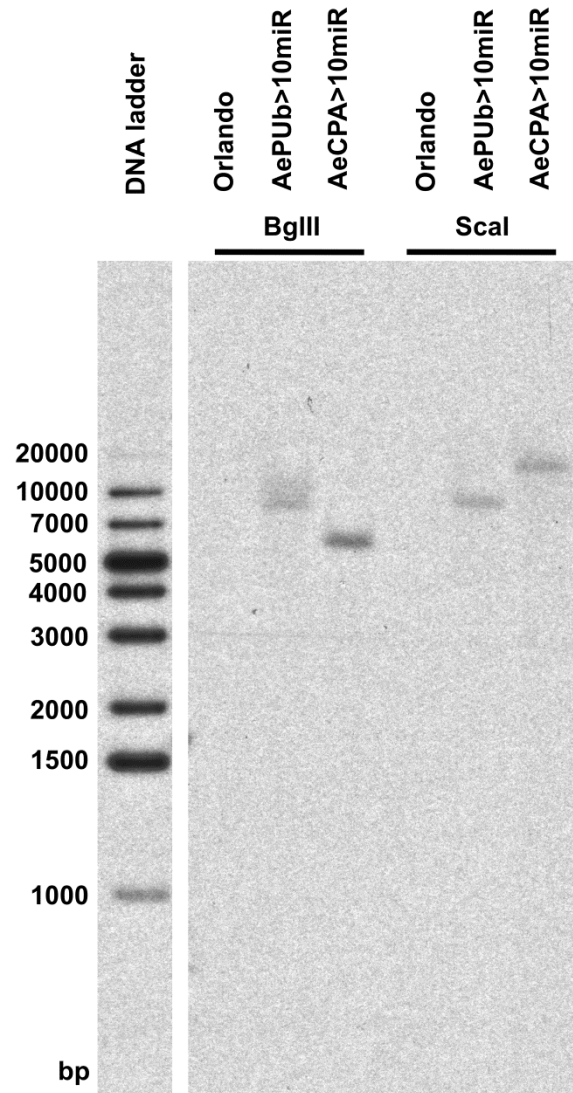

**Supplementary Figure 2. Detection of artificial antiviral miRNAs. a** in midgut and carcass. **b** in salivary glands. Information on replicates is provided and details are described in the legend of the figure 2.

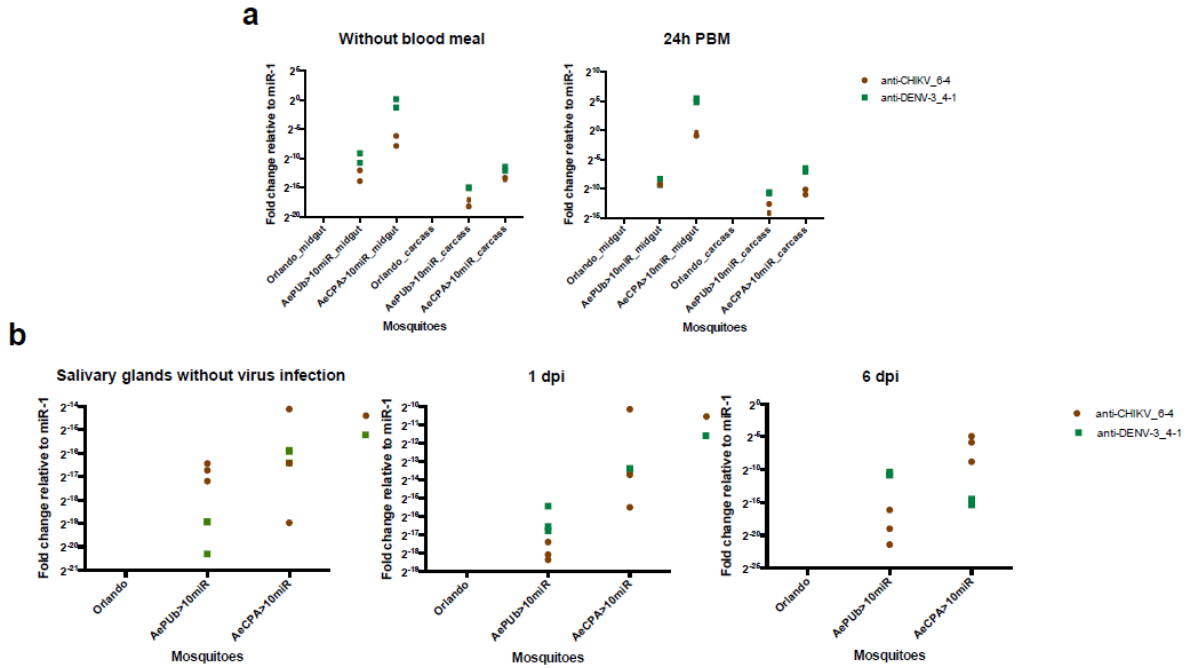

**Supplementary Figure 3. Anti-DENV-3/CHIKV phenotype of transgenic 4miR:D3 and 6miR:Chik mosquitoes.** **a** All samples. **b** Day 6 post CHIKV-infection. **c** Day 14 post DENV-3 infection. **d** Day 21 post DENV-3 infection. Information on replicates is provided and details are described in the legend of the figure 4. R1, replicate 1. R2, replicate 2

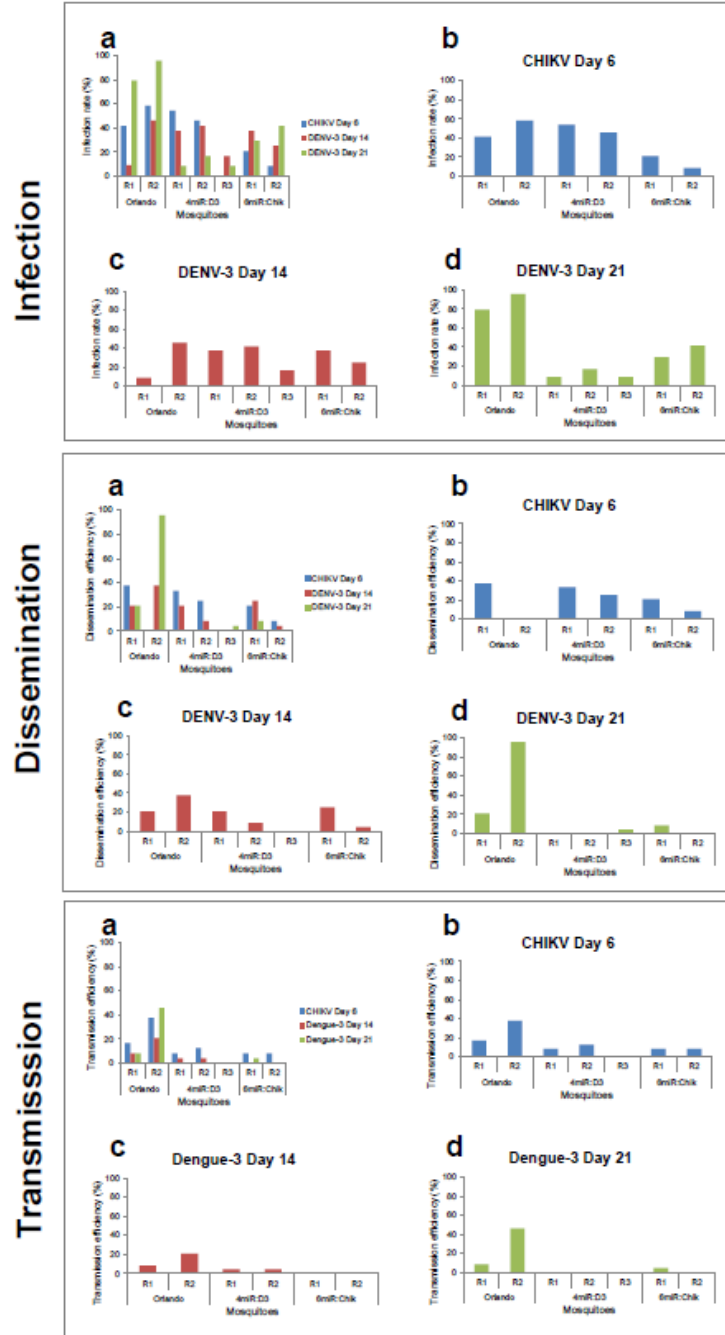

**Supplementary Figure 4. Anti-DENV-3/CHIKV phenotype of transgenic AePub>10miR and AeCPA>10miR mosquitoes. a All samples. b CHIKV. c DENV-3.** Information on replicates is provided and details are described in the legend of the figure 5. R1, replicate 1. R2, replicate 2. R3, replicate 3.

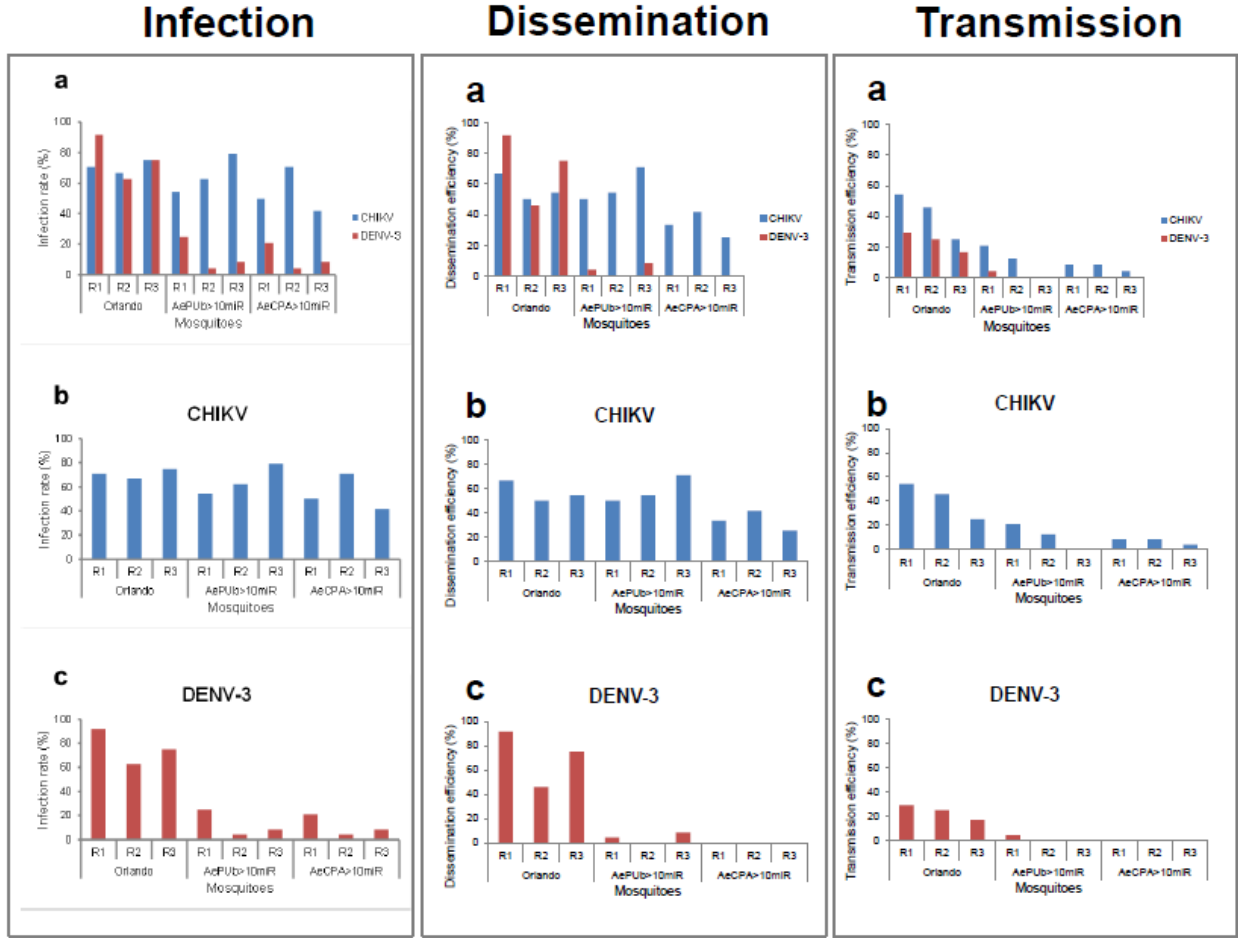



**Supplementary Figure 5. Antiviral phenotype in salivary glands.** Mosquito salivary glands were dissected in PBS and fixed with 4% paraformaldehyde at 6 days post-infection, followed by detection with anti-CHIKV antibody. The viral infection patterns were visualized under fluorescent microscopy.

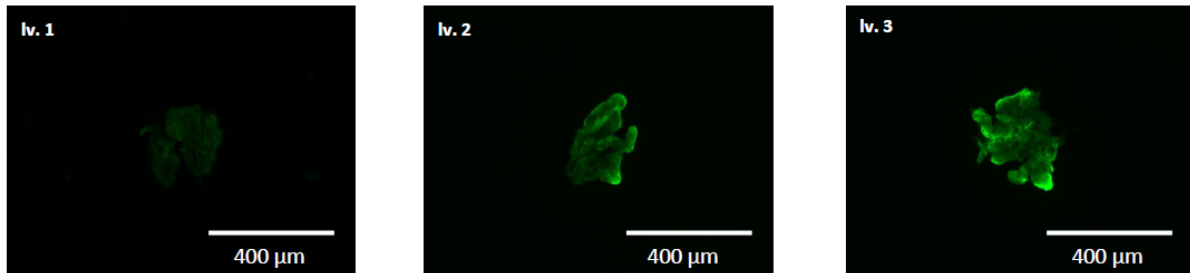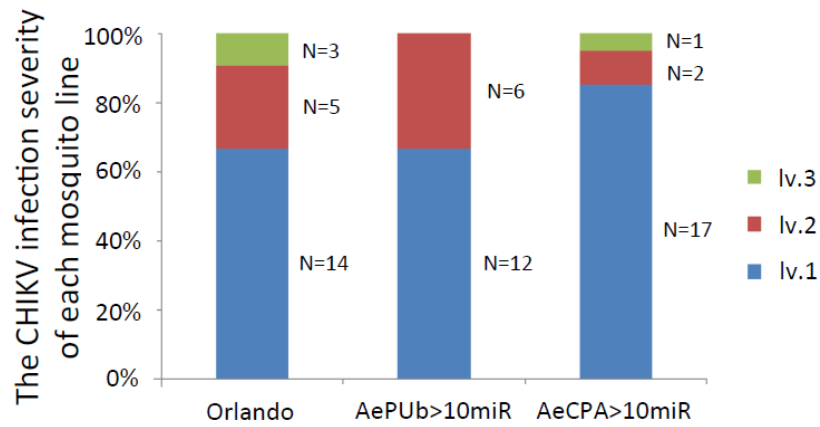

**Supplementary Figure 6. Antiviral phenotypic screenings for AePub>10miR and AeCPA>10miR mosquito lines.** The mosquito lines AePub>10miR and AeCPA>10miR were co-challenged with DENV-3 at  $10^7$  ffu/ml and CHIKV at  $10^6$  ffu/ml. The viral suppression efficiency was determined by the transmission efficiency at 6 and 14 dpi for CHIKV and DENV-3 respectively. AeCPA>10miR-3 (AeCPA>10miR) and AePub>10miR-1 (AePub>10miR) were analyzed in this study. Numbers above are the transmission efficiency and sample size.

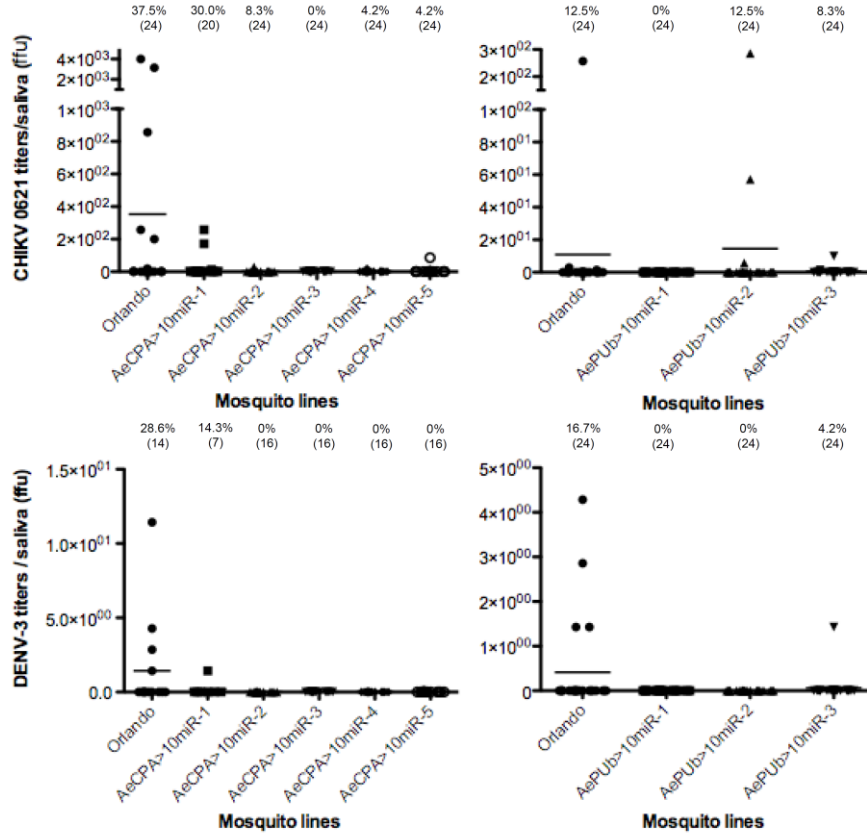

Supplement: 42003_2017_11_MOESM1_ESM.pdf [file 42003_2017_11_MOESM1_ESM.pdf]
